# Supplementary material for: Assessing the Dim Light Melatonin Onset in Adults with Autism Spectrum Disorder and No Comorbid Intellectual Disability
Source: Springer Nature journal article supplement (doi:10.1007/s10803-017-3122-4), 2017-04-26
Supplement: MOESM1 [file 12245498]

***Figure S1.*** Individual melatonin profiles (ASD-Only group)

*Note.* Y-axis = melatonin concentrations pg/mL; X-Axis = sampling time-points; Vertical line = habitual sleep onset time

***Figure S2.*** Individual melatonin profiles (ASD-Med group)

*Note.* Y-axis = melatonin concentrations pg/mL; X-Axis = sampling time-points; Vertical line = habitual sleep onset time


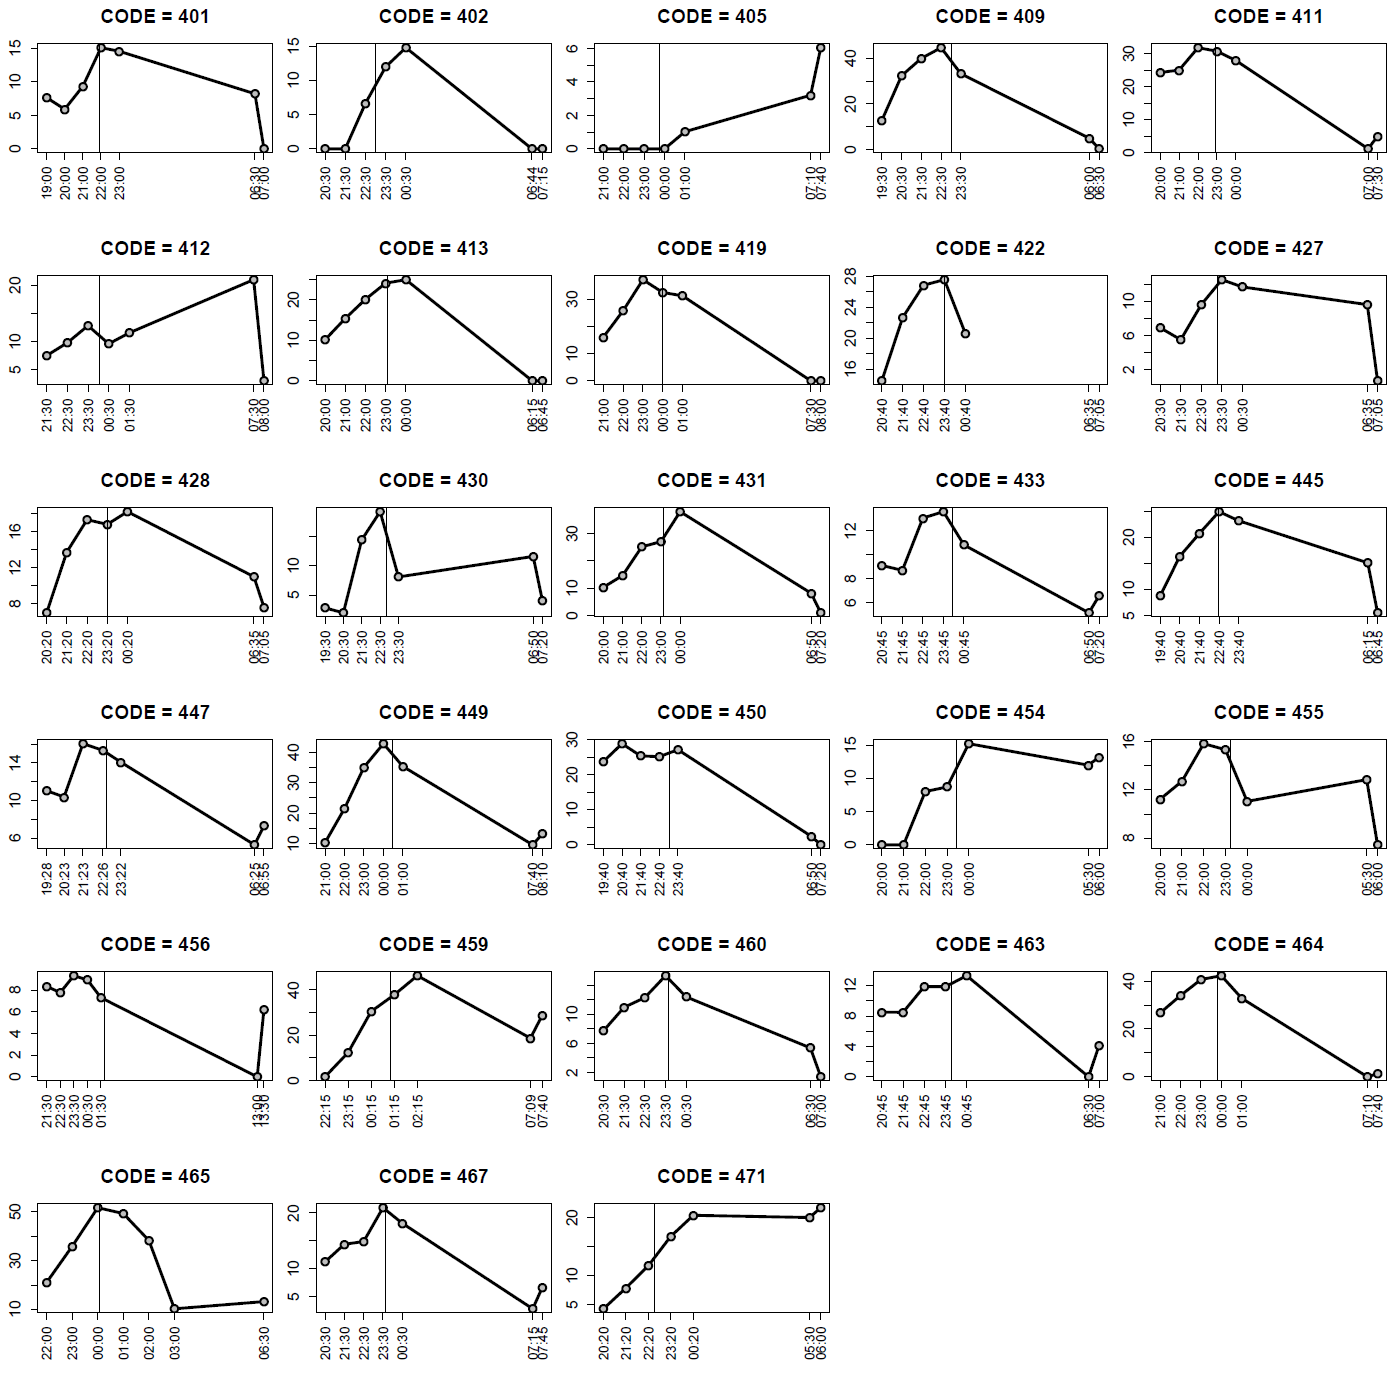


***Figure S3.*** Individual melatonin profiles (Control group)

*Note.* Y-axis = melatonin concentrations pg/mL; X-Axis = sampling time-points; Vertical line = habitual sleep onset time
